# Supplementary material
Source: PubMed Central journal article supplement (PMC9236176)

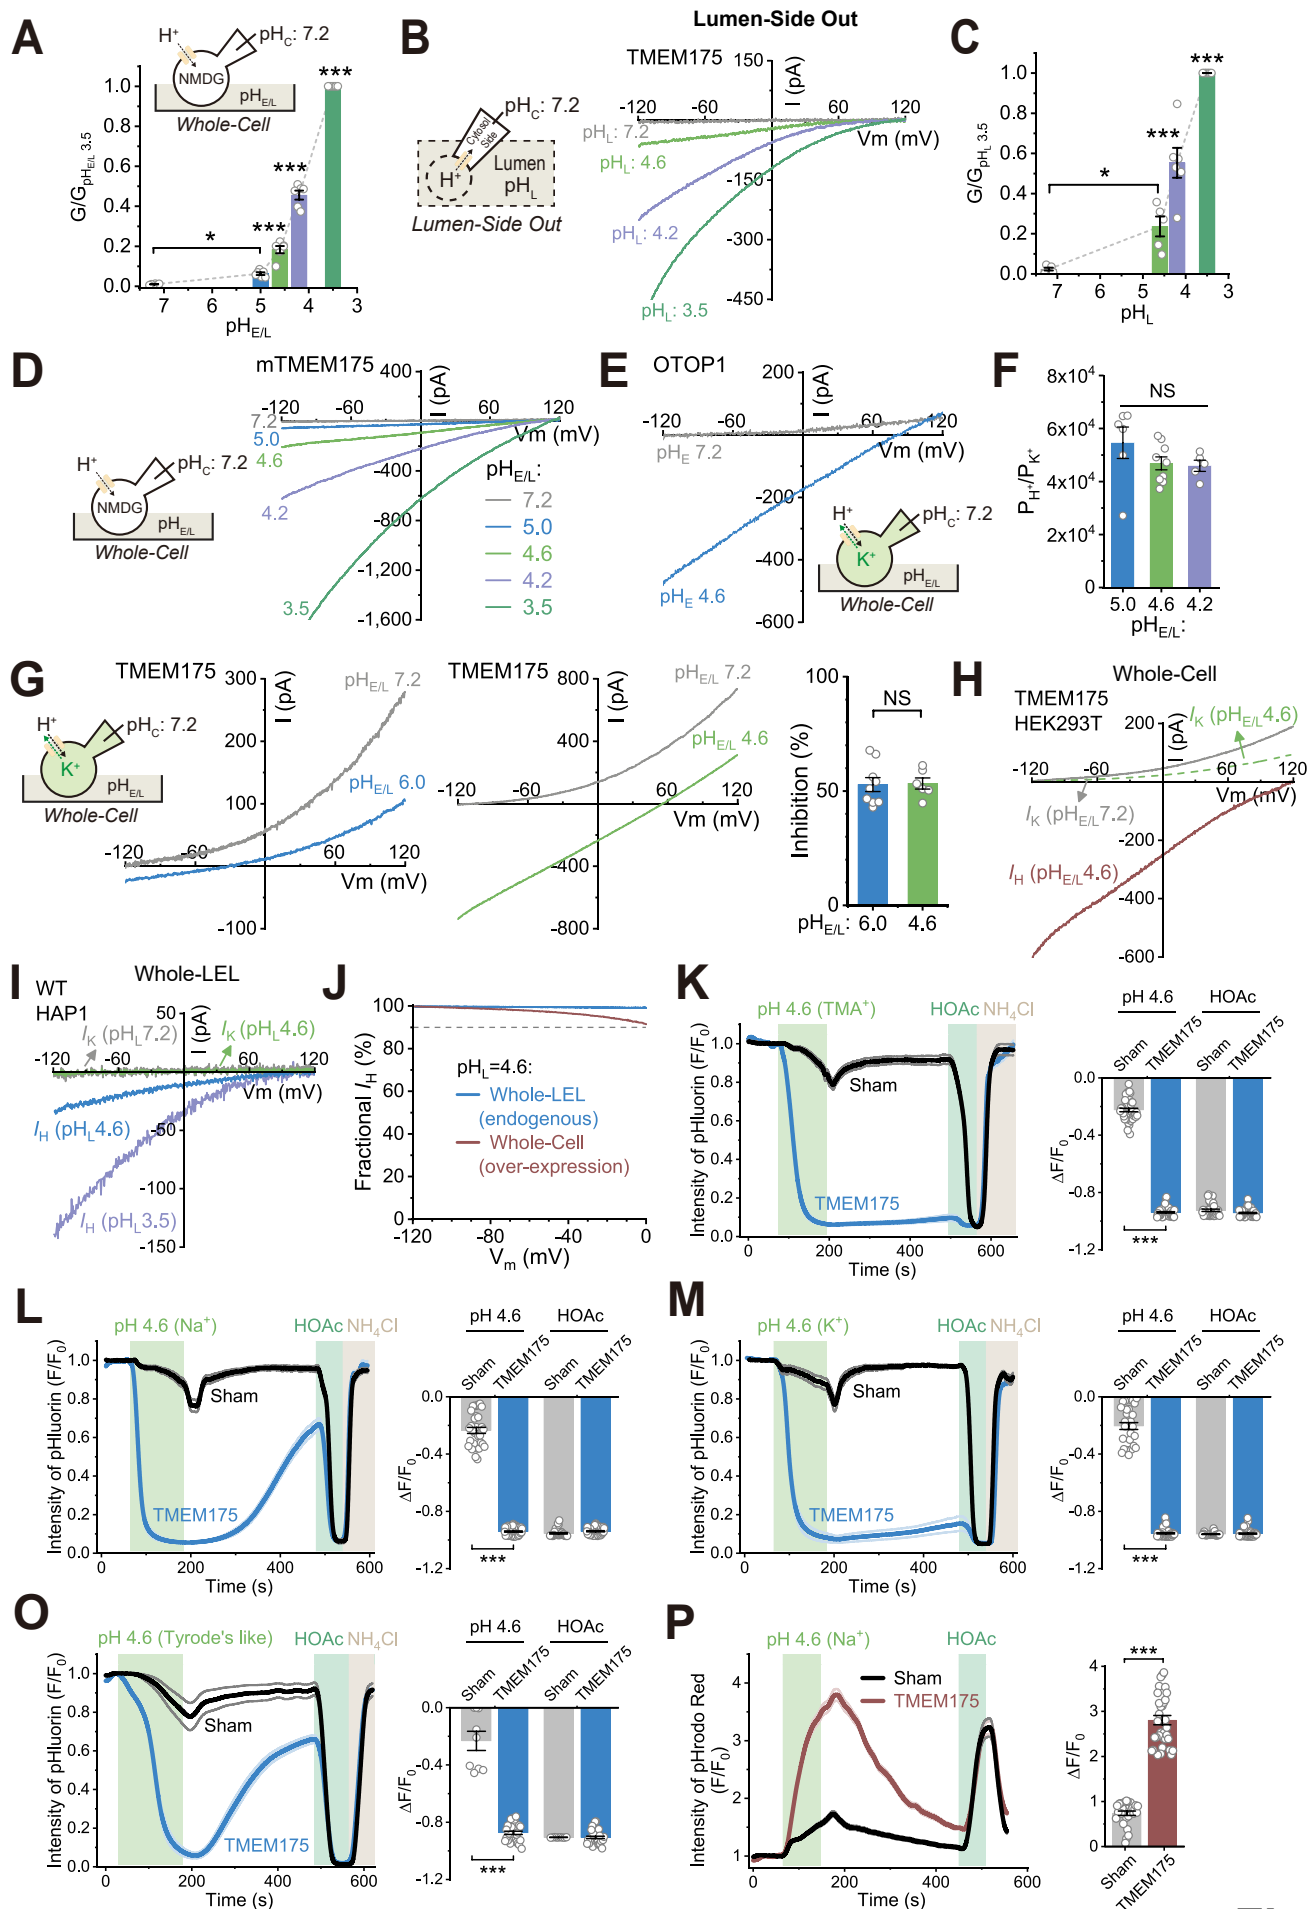

**Figure S3**

Supplement: NIHMS1811577-supplement-3.pdf [file NIHMS1811577-supplement-3.pdf]

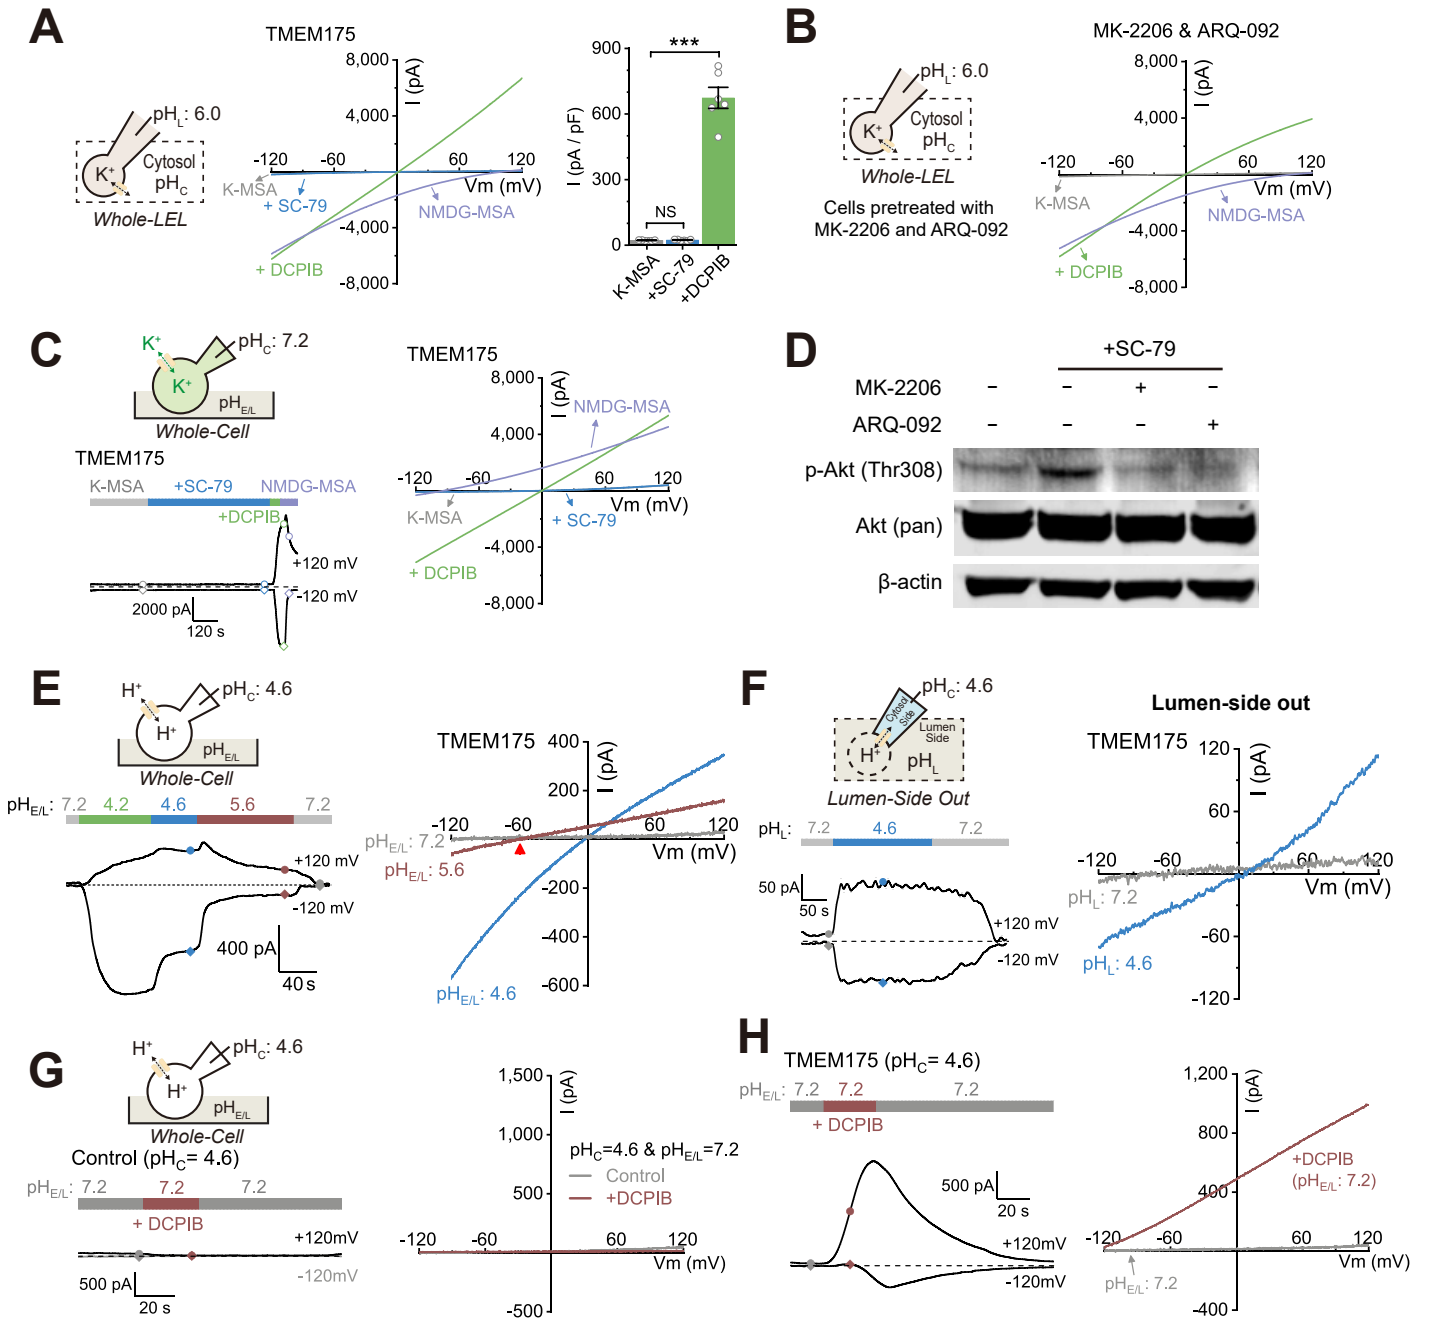

**Figure S5**

Supplement: NIHMS1811577-supplement-5.pdf [file NIHMS1811577-supplement-5.pdf]
